# Supplementary material
Source: publisher figshare collection journal article supplement (https://frontiersin.figshare.com/ndownloader/files/21928614)
Supplement: Supplementary file 1 [file 21928614]

Hello, my name is Michelle Lute; I am a fellow carnivore conservation scientist. I was wondering if you would be willing to take about 45 minutes of your time and chat with me about [case].

Please note that participation is voluntary and you can choose to stop participating at any point during the study. Individual responses are confidential and data will be analyzed and reported in aggregate form only. By agreeing to proceed with the interview, you indicate that you are at least 18 years of age and voluntarily agree to participate in this research study.

1) What legal, moral, practical, ecological and/or economic arguments are invoked in decision-making about [case study]?

2) Are local interests represented or stakeholders involved in the decision-making process? If so, how and to what extent?

3) Is there a stated or implied goal that people and [species] share the same landscapes? Alternatively, is [species] conservation focused on protected areas?

4) Is there a stated or implied goal that people adapt to [species] (by taking actions, changing behaviors, shifting attitudes, etc.)?

5) Do you know of evidence that suggests [species] adapts to humans? Are these adaptions advantageous for [species] and/or humans?

6) Is there a stated or implied goal that people accept some level of conflict with [species]?

7) Are proactive solutions (e.g., nonlethal tools to prevent depredation) implemented or required as part of any recovery/management plan?

8) What are the justifications offered for any proposed lethal control of [species]?

9) What are the possible issues driving conflict between stakeholders? Some examples are:

- Fear of [species]
- Lack of transparency in decision processes
- Depredation on domestic livestock
- Mistrust between decision-makers and locals
- Misunderstanding attitudes of others
- Unequal power among stakeholders
- Risks (real or perceived) posed by [species] to human safety
- Competition with hunters for wild prey

10) Is there anything else you'd like to add about the case? Please elaborate on anything you feel is relevant to the case that your responses to these questions haven't covered.

11) Can you recommend studies germane to this case or anyone else who might be willing to talk to me about [the case]?

Thank you so much for your time.
